# Supplementary figures and images for: Genome-Wide Screening for Pathogenic Proteins and microRNAs Associated with Parasite–Host Interactions in Trypanosoma brucei
Source: MDPI journal article supplement (doi:10.3390/insects13110968), 2022-10-22

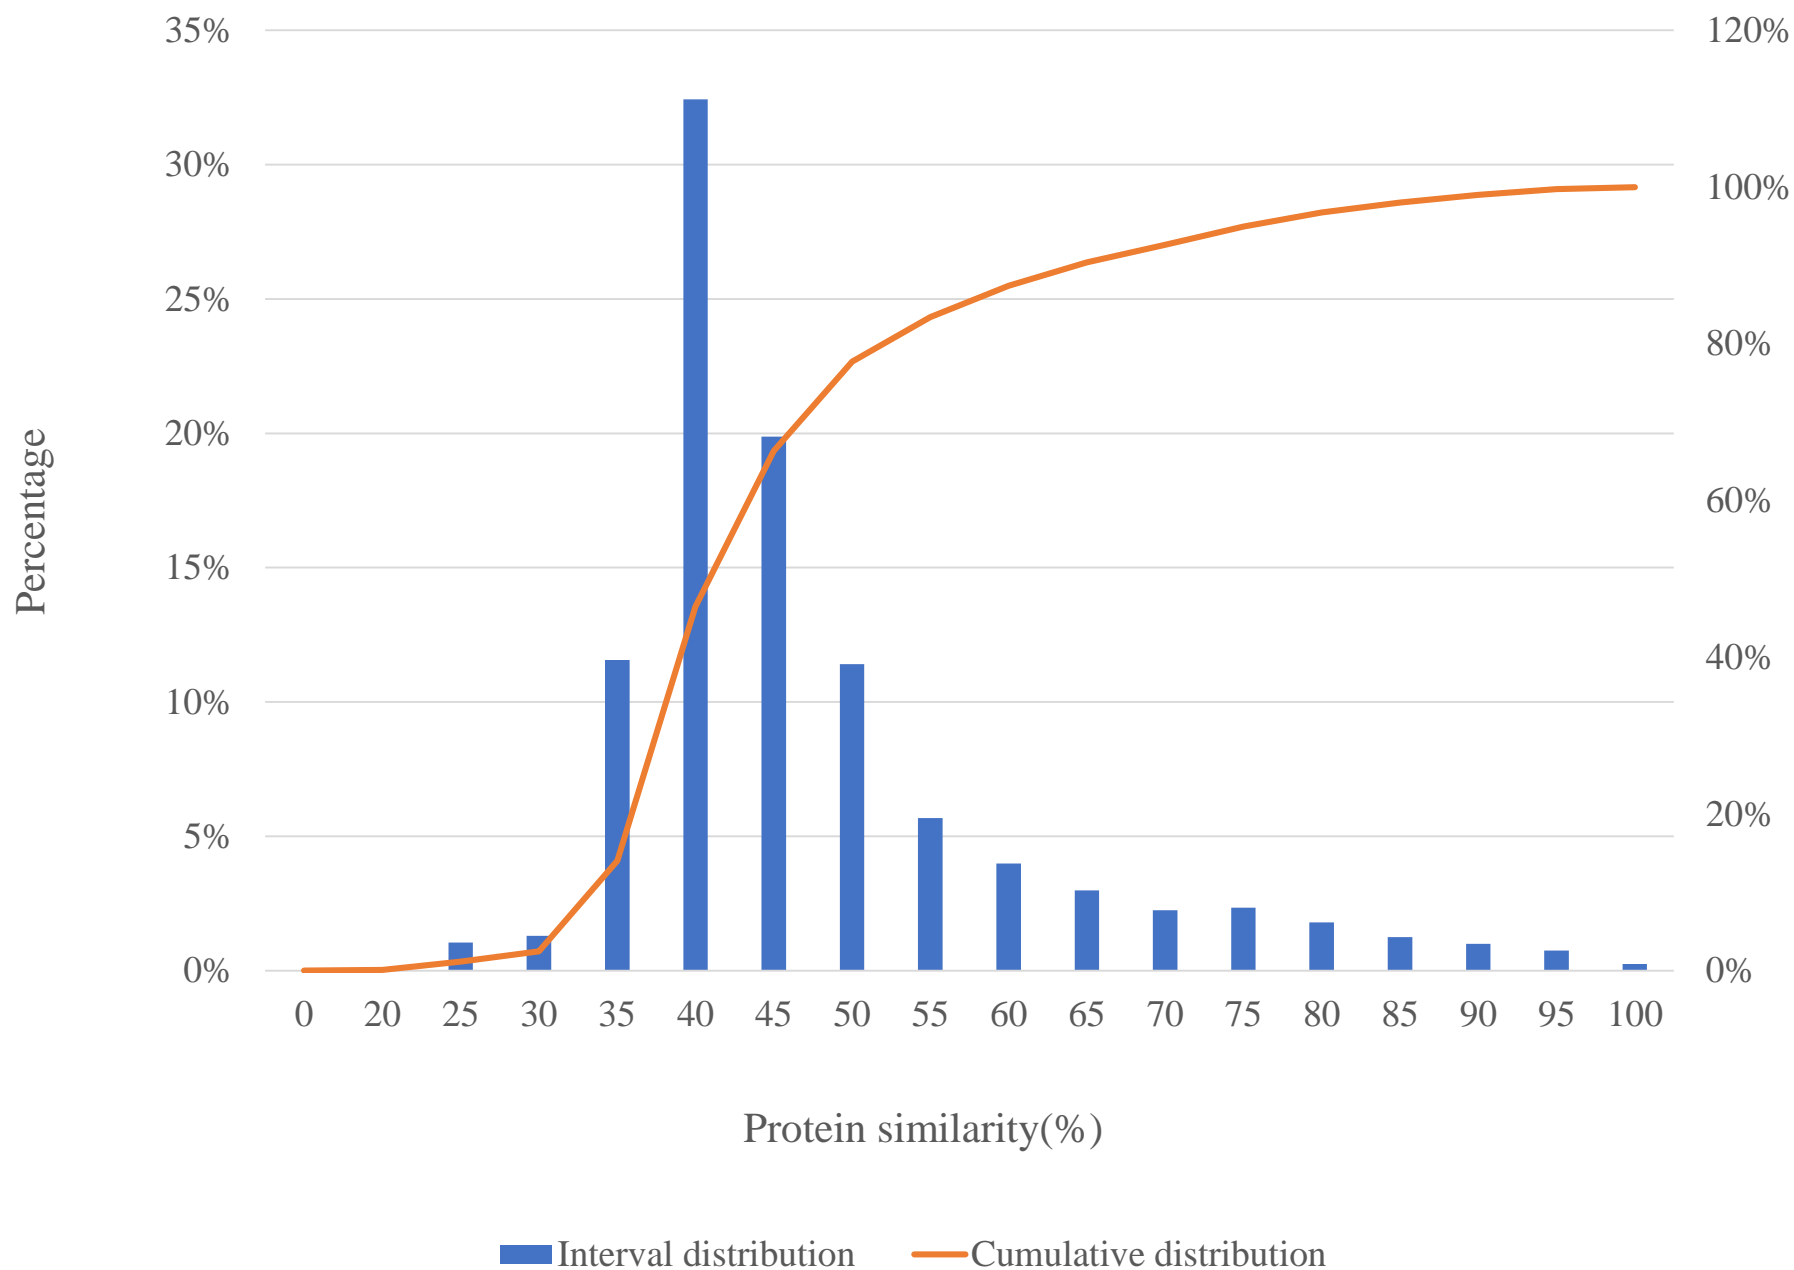

Supplement: s1 [file s1]

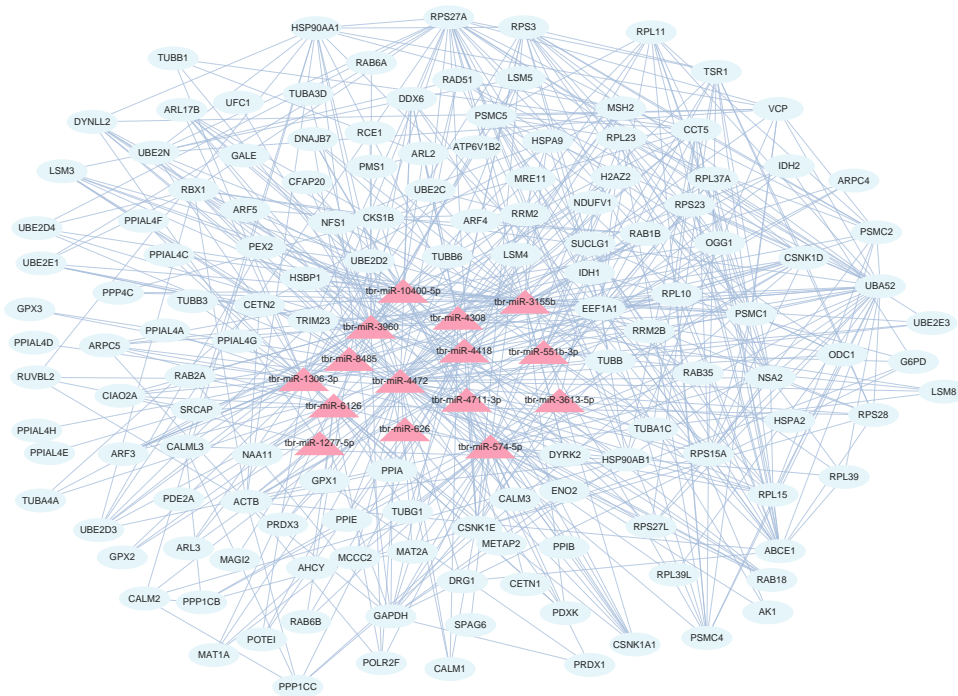

Supplement: s1 [file s1]
